# Supplementary material
Source: MDPI journal article supplement (https://www.mdpi.com/2311-7524/9/6/693)
Supplement: s1 [file s1]

Table S1: The percentage ratio of cultivation mixture by weight of *H. erinaceus* spawns in the experiment.

| <b>Treatments<br/>(w/w)</b> | <b>Rubberwood<br/>sawdust</b> | <b>Soybean<br/>meal</b> | <b>Fine bran</b> | <b>Corn stalk</b> | <b>Lime</b> |
|-----------------------------|-------------------------------|-------------------------|------------------|-------------------|-------------|
| 1                           | 80                            | 0                       | 12               | 7                 | 1           |
| 2                           | 78                            | 2                       | 12               | 7                 | 1           |
| 3                           | 76                            | 4                       | 12               | 7                 | 1           |
| 4                           | 74                            | 6                       | 12               | 7                 | 1           |
| 5                           | 72                            | 8                       | 12               | 7                 | 1           |
| 6                           | 70                            | 10                      | 12               | 7                 | 1           |

\* Treatment 1 = RS80:SM0, 2 = RS78:SM2, 3 = RS76:SM4, 4 = RS74:SM6, 5 = RS72:SM8 and 6 = RS70:SM10
